# Supplementary material for: Liquid Phase Deposition of Silica on the Hexagonally Close‐Packed Monolayer of Silica Spheres
Source: Hindawi journal article supplement (doi:10.1155/2013/510524), 2013-01-01
Supplement: f1 [file 510524.f1.docx]

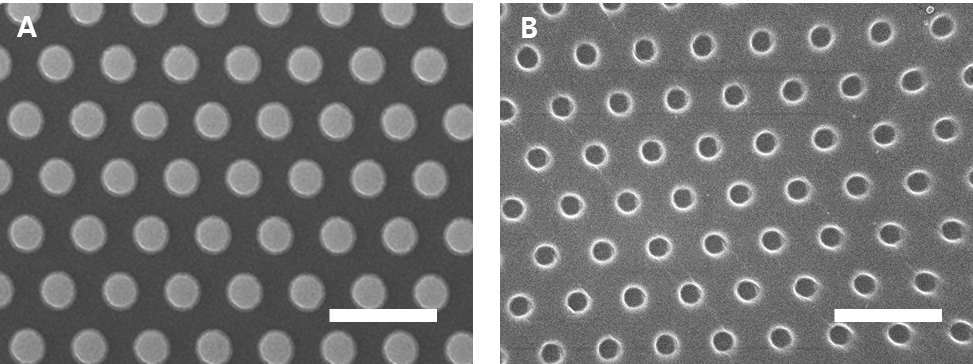


**Figure S1.** The SEM images of patterned substrate. (A) The patterned Si substrate with protrusion of hemisphere shape. (B) The patterned PDMS stamp with hexagonal array of wells, contrary to the patterned Si substrate. Scale bars are 1μm.
